# Supplementary material
Source: Springer Nature journal article supplement (https://www.springermedizin.de/resource/supplementary/12889_2009_1925_MOESM1_ESM.pdf/9484428)

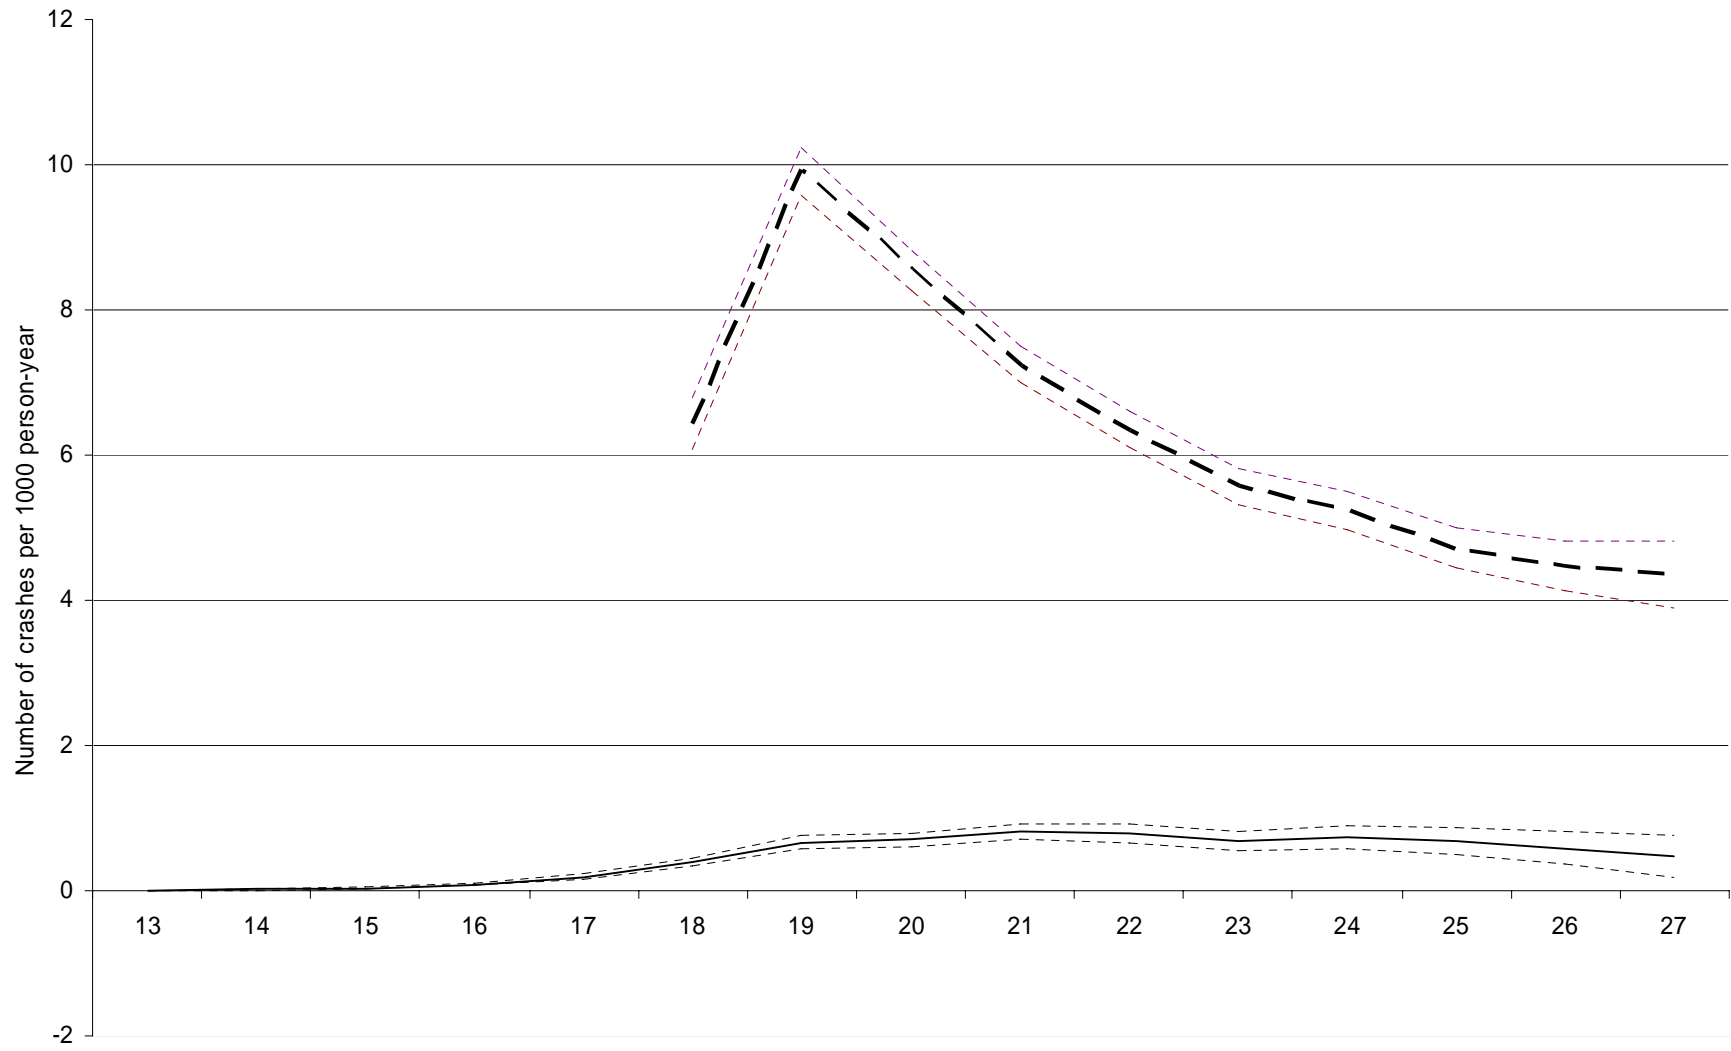

— Unlicensed car crashes    - - Licensed car crashes    - - - 95% confidence interval    Age

Supplement: MOESM1 [file 9484428]
